# Supplementary material for: Aromatic C–F activation at Ni in the presence of a carbon–chlorine bond: the nickel mediated synthesis of new pyrimidines
Source: Royal Society of Chemistry journal article supplement (doi:10.1039/b110128e), 2002-01-01
Supplement: b110128e.doc [file b110128e.doc]

# Supplementary Information

**————————————————————————————**

**Aromatic CF Activation at Ni in the Presence of a Carbon Chlorine Bond: The Nickel Mediated Synthesis of new Pyrimidines**

**—————————————————————————————————————**

**Marianna I. Sladek, Thomas Braun*, Beate Neumann and Hans-Georg Stammler**

*Fakultät für Chemie, Universität Bielefeld, Postfach 100131, D-33501 Bielefeld, Germany,*

*E-mail: thomas.braun@uni-bielefeld.de*

*Received November 2001*

*Preparation and analytical data for* **1**:

A suspension of [Ni(COD)2] (306 mg, 1.10 mmol) in hexane (6 mL) was treated with PEt3 (350 l, 2.40 mmol). The solution was stirred for 15 min at room temperature until the colour changed from red-purple to yellow. After adding 5-chloro-2,4,6-trifluoropyrimidine (137 l, 1.32 mmol) the solution was stirred for 2 h and the volatiles were removed under vacuum. The orange residue was suspended in hexane (10 mL) and filtered. The filtrate was concentrated to about 2 mL in vacuo. Yellow crystals of **1** were obtained at –20 °C overnight. Yield 98 mg (20%) (Found: C, 40.84; H, 6.53; N, 5.99%. C16H30ClF3N2NiP2 requires: C, 41.46; H, 6.52; N, 6.04%). 31P NMR (202.5 MHz, C6D6, 300K): ** 15.83 (s). 19F NMR (470.4 MHz, C6D6, 300K): **  (s, br, 2 F), (s, br, 1 F).

*Preparation and analytical data for* **2**:

Compound **2** was prepared in an analogous procedure as described for **1** starting from [Ni(COD)2] (110 mg, 0.40 mmol), PCy3 (286 mg, 1.02 mmol) and 5-chloro-2,4,6-trifluoropyrimidine (50 l, 0.48 mmol). Yield 107 mg (34%) (Found: C, 60.50; H, 8.35; N, 3.59%. C40H66ClF3N2NiP2 requires: C, 60.97; H, 8.44; N, 3.55%). 31P NMR (202.5 MHz, C6D6, 300K): ** 19.65 (d, *J*PF 39 Hz). 19F NMR (470.4 MHz, C6D6, 300K): ** 49.86 (s, 1 F), 73.67 (s, 1F), 377.56 (t, *J*PF 40 Hz, 1F).

*Preparation and analytical data for* **3**:

Heating a sample of **2** (90 mg, 0.11 mmol) together with NaCl (20 mg, 0.32 mmol) in thf (3 mL) at 343 K for 3 d led to complex **3**. After removing the solvent under vacuum, the orange solid was recrystallised from hexane at 0 °C. Yield: 45 mg (50%) (Found: C, 59.92; H, 8.70; N, 3.10%. C40H66Cl2F2N2NiP2 requires: C, 59.72; H, 8.27; N, 3.48%). 31P NMR (202.4 MHz, C6D6, 300K): ** 15.67 (s). 19F NMR (470.4 MHz, C6D6, 300K): **  (s, 1 F), (s, 1 F).

*Crystal data for* **1**: C16H30ClF3N2NiP2, *M* = 463.52, triclinic, space group , *a* = 11.8700(1), *b* = 13.3690(1), *c* = 14.1440(2) Å,  = 97.9150(5)°,  = 96.7310(5)°,  = 90.4950(4)°, *U* = 2207.11(4) Å3, *T* = 100 K, (Mo-K) = 1.172 mm1, *Z* = 4, *D*c = 1.395 g cm3, 89302 reflexions measured, 12851 unique (*R*int = 0.033). Final *R1*, *wR2* values on all data 0.0395, 0.0710. *R1*, *wR2*values on [*I*o > 2(*I*o), 10758 reflexions] data 0.0289, 0.0670.


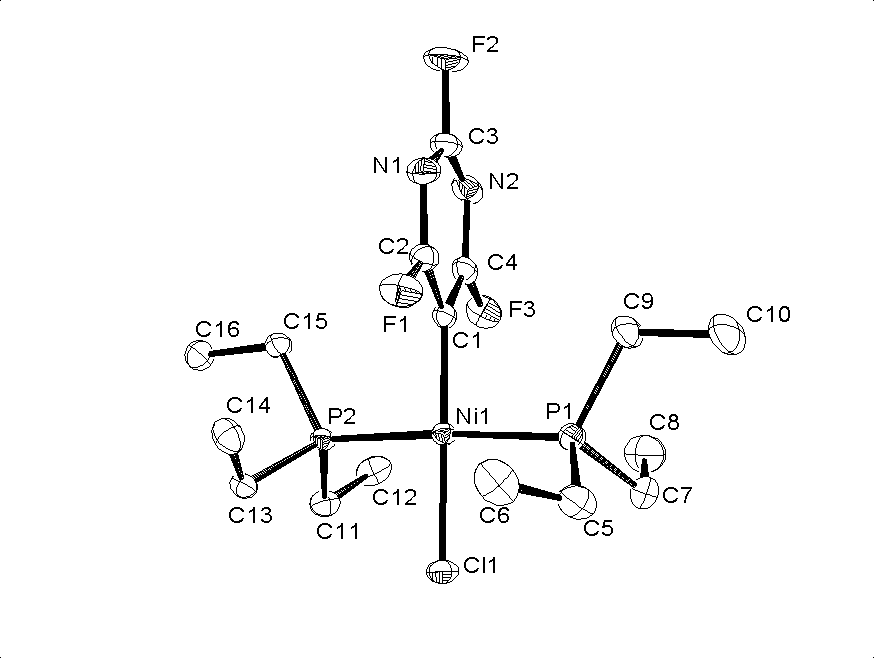


**Fig.** An ORTEP diagram of **1**. Ellipsoids are drawn at the 50% probability level. Selected bond lengths (Å) and angles (°):Ni(1)–Cl(1) 2.1983(4), Ni(1)–C(1) 1.8849(13), C(1)-C(4) 1.3817(19), N(2)-C(4) 1.3290(18), N(2)-C(3) 1.310(2), N(1)-C(3) 1.310(2), N(1)-C(2) 1.3253(18), C(1)-C(2) 1.3876(19), F(1)-C(2) 1.3483(17), F(2)-C(3) 1.3439(17), F(3)-C(4) 1.3449(19), C(1)-Ni(1)-Cl(1) 178.30(4), P(1)-Ni(1)-P(2) 176.378(15).
